# Supplementary material
Source: publisher figshare collection journal article supplement (https://acs.figshare.com/ndownloader/files/4650730)
Supplement: Supplementary file 1 [file 4650730]

## Supplementary Material.

The purpose of this part is to derive expressions for the Kirkwood-Buff integrals (KBIs) in binary systems. For binary mixtures, Kirkwood and Buff <sup>7</sup> obtained the following expressions for the partial molar volumes, the isothermal compressibility and the derivatives of the chemical potential with respect to concentrations

$$v_1 = \frac{1 + (G_{22} - G_{12})c_2}{c_1 + c_2 + c_1c_2(G_{11} + G_{22} - 2G_{12})} \quad (\text{A-1})$$

$$v_2 = \frac{1 + (G_{11} - G_{12})c_1}{c_1 + c_2 + c_1c_2(G_{11} + G_{22} - 2G_{12})} \quad (\text{A-2})$$

$$kTk_T = \frac{1 + c_1G_{11} + c_2G_{22} + c_1c_2(G_{11}G_{22} - G_{12}^2)}{c_1 + c_2 + c_1c_2(G_{11} + G_{22} - 2G_{12})} \quad (\text{A-3})$$

$$\left( \frac{\partial \mu_1}{\partial x_1} \right)_{T,P} = \frac{kT}{x_1(1 + x_1c_2(G_{11} + G_{22} - 2G_{12}))} \quad (\text{A-4})$$

$$\left( \frac{\partial \mu_1}{\partial c_1} \right)_{T,P} = \frac{kT}{c_1(1 + c_1(G_{11} - G_{12}))} \quad (\text{A-5})$$

where P is the pressure, T is the absolute temperature,  $\nu_\alpha$  is the partial molar volume per molecule of species  $\alpha$ ,  $\mu_1$  is the chemical potential per molecule of component 1,  $k$  is the Boltzmann constant,  $k_T$  is the isothermal compressibility,  $c_\alpha$  is the bulk molecular

concentration of component  $\alpha$  and  $x_\alpha$  is the mole fraction of component  $\alpha$ . Because

$c_1v_1 + c_2v_2 = 1$ , one can solve Eqs. (A-1, A-3 and A-5) to obtain the following

expressions for the KBIs

$$G_{11} = kTk_T - \frac{1}{c_1} + \frac{c_2v_2}{c_1^2\mu_{11}^{(c)}} \quad (\text{A-6})$$

$$G_{22} = kTk_T - \frac{1}{c_2} + \frac{v_1^2}{c_2v_2\mu_{11}^{(c)}} \quad (\text{A-7})$$

and

$$G_{12} = kTk_T - \frac{v_1}{c_1\mu_{11}^{(c)}} \quad (\text{A-8})$$

where  $\mu_{11}^{(c)} = \frac{1}{kT} \left( \frac{\partial \mu_1}{\partial c_1} \right)_{T,P} = \left( \frac{\partial \ln a_1}{\partial c_1} \right)_{T,P}$ ,  $a_1$  is the activity of component 1 and  $k$  is

Boltzmann's constant. Eq. (A-6) was derived by Zimm<sup>9</sup> (there is a misprint in Zimm's paper (eq. (10)) where the sign is (-) instead of (+) before the third term in the left hand side of eq. (A-6).

The KBIs can be also expressed in terms of  $\mu_{11}^{(x)} = \frac{1}{kT} \left( \frac{\partial \mu_1}{\partial x_1} \right)_{T,P} = \left( \frac{\partial \ln a_1}{\partial x_1} \right)_{T,P}$ .

Eqs. (A-1, A-3 and A-4) provides the following expressions for the KBIs

$$G_{11} = kTk_T - \frac{1}{c_1} + \frac{c_2v_2^2(c_1 + c_2)^2}{c_1^2\mu_{11}^{(x)}} \quad (\text{A-9})$$

$$G_{22} = kTk_T - \frac{1}{c_2} + \frac{v_1^2(c_1 + c_2)^2}{c_2\mu_{11}^{(x)}} \quad (\text{A-10})$$

and

$$G_{12} = kTk_T - \frac{v_1v_2(c_1 + c_2)^2}{c_1\mu_{11}^{(x)}} \quad (\text{A-11})$$

These expressions are the same as those obtained by Matteoli and Lepori <sup>10</sup>.
